# Supplementary material for: Trends in neurology medical education: a bibliometric analysis (2000–2023)
Source: Frontiers journal article supplement (doi:10.3389/feduc.2025.1610465), 2025-06-25
Supplement: Table_4.xlsx [file Table_4.xlsx]

## Sheet: Sheet1
Authors with document ≥1
Rank	Authors	Documents	Citations	Total link strength
1	gilbert, donald l.	10	61	34
2	lukas, rimas v.	9	86	29
3	soni, madhu	9	117	62
4	safdieh, joseph e.	8	81	43
5	sandrone, stefano	8	93	58
6	albert, dara v. f.	7	17	38
7	brorson, james r.	6	68	23
8	juul, dorthea	6	49	29
9	sarva, harini	6	82	59
10	strowd, roy e.	6	55	41
11	faulkner, larry r.	5	61	24
12	gutmann, laurie	5	23	30
13	josephson, s. andrew	5	105	23
14	salas, rachel marie e.	5	51	30
15	urion, david k.	5	61	32
16	agarwal, nitin	4	72	19
17	albert, dara v.	4	62	16
18	border, scott	4	154	31
19	cios, jacquelyne	4	67	45
20	doja, asif	4	115	32
21	engstrom, john w.	4	105	9
22	feist, terri b.	4	23	11
23	govindarajan, raghav	4	67	28
24	grisold, w.	4	78	28
25	lewis, ariane	4	25	17
26	moeller, jeremy	4	9	13
27	owens, james w. m.	4	61	38
28	robbins, matthew s.	4	22	13
29	schneider, logan d.	4	67	45
30	southerland, andrew m.	4	20	23
31	stone, robert thompson	4	38	17
32	weber, daniel	4	58	42
33	andriole, dorothy a.	3	203	9
34	bandyopadhyay, soham	3	8	26
35	berthaud, jimmy v.	3	53	34
36	carlson, chad	3	52	33
37	dixit, neel	3	52	33
38	edgar, laura	3	16	25
39	erklauer, jennifer c.	3	13	41
40	farheen, amtul	3	52	33
41	francoeur, conall	3	46	33
42	freeman, william d.	3	32	25
43	gamaldo, charlene	3	16	24
44	gamaldo, charlene e.	3	41	17
45	glick, th	3	54	2
46	gold, carl a.	3	9	14
47	guerriero, rejean m.	3	49	27
48	hall, samuel	3	48	28
49	isaacson, richard s.	3	19	23
50	jozefowicz, ralph f.	3	32	6
51	khan, jaffar	3	18	10
52	kirschen, matthew p.	3	67	35
53	kraker, jessica	3	52	33
54	labare, julie a.	3	12	9
55	lal, vivek	3	10	17
56	lanska, douglas j.	3	5	0
57	lemmon, monica e.	3	17	12
58	london, zachary	3	12	36
59	massey, janice m.	3	14	14
60	mata, douglas a.	3	2	2
61	moeller, jeremy j.	3	33	4
62	ooi, setthasorn zhi yang	3	8	26
63	park, jay j.	3	8	32
64	park, yoon soo	3	14	13
65	patino, gustavo	3	52	33
66	preston, david c.	3	43	13
67	saylor, deanna	3	11	13
68	tan, kevin	3	87	16
69	tan, nigel c. k.	3	87	16
70	tasker, robert c.	3	82	8
71	thompson-stone, robert	3	15	12
72	verbeck, nicole	3	7	15
73	watling, christopher j.	3	36	9
74	wijdicks, eelco f. m.	3	158	10
75	abd-elsayed, alaa	2	8	21
76	ahmed, shahzaib	2	4	21
77	ahmed, zubair a.	2	21	4
78	ali, imran i.	2	30	15
79	aminoff, michael j.	2	5	6
80	appavu, brian l.	2	7	37
81	arantes, mavilde	2	14	17
82	asadi-pooya, ali a.	2	5	5
83	balcer, laura j.	2	34	13
84	barratt, diana	2	16	12
85	barsuk, jeffrey h.	2	165	12
86	bassetti, claudio l. a.	2	49	19
87	bega, danny	2	16	8
88	benjamin, sheldon	2	18	2
89	benzil, deborah l.	2	116	13
90	berardelli, alfredo	2	12	25
91	bernat, james l.	2	24	8
92	birbeck, gretchen l.	2	4	9
93	bligh, emily r.	2	1	20
94	blood, angela d.	2	10	7
95	bonifati, dm	2	20	10
96	bontempo, laura j.	2	515	33
97	braun, melanie k.	2	11	11
98	breuckmann, frank	2	7	17
99	brich, jochen	2	24	6
100	burisch, christian	2	7	17
101	burish, mark j.	2	26	7
102	burkey, adam	2	8	21
103	cahill, carolyn	2	24	12
104	calabrese, trisha	2	27	31
105	campbell, julia l.	2	8	6
106	carvalho, vanessa	2	49	19
107	casper, stephen t.	2	15	1
108	cendan, juan c.	2	19	10
109	chamberlain, amanda	2	10	32
110	chandrasekhar, sujana s.	2	515	33
111	charles, stephen c.	2	11	12
112	chen, patrick m.	2	11	3
113	chiota-mccollum, nicole	2	15	8
114	cohen, elaine r.	2	165	12
115	cohen-schotanus, janke	2	31	10
116	corboy, j. r.	2	49	9
117	corrigan, maureen d.	2	515	33
118	cruz, tiana e.	2	20	9
119	cryan, john f.	2	71	7
120	cuffaro, luca	2	16	17
121	davies, benjamin	2	20	14
122	davis, larry e.	2	13	3
123	demaerschalk, bart m.	2	20	14
124	demetriades, andreas k.	2	7	16
125	deng, stella	2	3	11
126	dewey, jeffrey	2	5	3
127	dewey, jeffrey j.	2	8	8
128	di liberto, giovanni	2	49	19
129	dixit, karan s.	2	36	7
130	do, betty s. tsai	2	515	33
131	doherty-allan, r.	2	29	8
132	dominguez, moises	2	22	4
133	dubois, b.	2	20	28
134	elmansouri, ahmad	2	33	21
135	fahy, brenda g.	2	19	8
136	fantaneanu, tadeu a.	2	38	12
137	faucett, erynne a.	2	515	33
138	field, emily	2	13	6
139	finestone, sandra a.	2	515	33
140	finkel, ag	2	40	1
141	florendo-cumbermack, anita	2	3	8
142	frank, sa	2	22	2
143	freedman, daniel a.	2	1	11
144	galetta, steven l.	2	34	13
145	gali, kari	2	27	31
146	gartmeier, martin	2	1	10
147	gillespie, conor s.	2	8	22
148	greer, david m.	2	132	15
149	guilliams, kristin p.	2	7	37
150	gunderson, ch	2	84	7
151	harrison, charlotte h.	2	33	21
152	heary, robert f.	2	23	12
153	hocker, sara	2	38	5
154	hohler, anna depold	2	14	4
155	hollingsworth, deena b.	2	515	33
156	holloway, robert g.	2	87	2
157	hong, sue j.	2	7	37
158	horn, paul s.	2	16	12
159	hueneke, sarah	2	27	31
160	hunderfund, andrea leep	2	9	13
161	isaacson, richard	2	10	32
162	jackson, hannah s.	2	3	11
163	jan, mms	2	26	1
164	javaid, muhammad asim	2	71	7
165	jeffe, donna b.	2	193	6
166	jette, nathalie	2	8	13
167	ji, sibei	2	7	16
168	johnson, teresa r.	2	19	10
169	jones, lyell k., jr.	2	10	3
170	joshi, sucheta	2	27	31
171	józefowicz, rf	2	90	5
172	kanner, andres m.	2	40	4
173	katzenbach, alexis	2	27	31
174	kelley, david m.	2	515	33
175	kelly, michael s.	2	11	11
176	keser, zafer	2	7	11
177	kilgore, shannon m.	2	8	10
178	king, molly k.	2	13	3
179	kirkman, matthew a.	2	16	6
180	kmucha, steven t.	2	515	33
181	knopman, david s.	2	260	18
182	kopper, regis	2	19	10
183	korb, pearce j.	2	16	11
184	kotter, mark	2	20	14
185	kraakevik, jeff	2	13	22
186	kraakevik, jeff a.	2	30	15
187	kuks, jan b. m.	2	31	10
188	kurzweil, arielle	2	34	13
189	ladonna, kori a.	2	14	9
190	lakhan, shaheen e.	2	5	3
191	laroche, suzette m.	2	22	26
192	larovere, kerri l.	2	60	8
193	le marne, fleur a.	2	0	20
194	lelli, daniel	2	4	9
195	li, qing	2	7	16
196	lim, erle c. h.	2	29	11
197	lindgren, kristen a.	2	172	5
198	lisnic, v.	2	67	11
199	loftus, angela m.	2	80	5
200	lok, benjamin c.	2	19	10
201	london, zachary n.	2	16	6
202	lovett, marlina e.	2	7	37
203	lyons, rebecca	2	19	10
204	mancuso, m	2	20	10
205	marsch, stephan	2	7	17
206	marshall, cullen s.	2	3	11
207	mateen, farrah j.	2	153	9
208	mccarron, m. o.	2	29	8
209	mccarron, mark o.	2	80	5
210	mccolgan, p.	2	29	8
211	mccoyd, matthew	2	15	8
212	mccullough, louise d.	2	149	10
213	mckeown, p. p.	2	29	8
214	mehta, sahil	2	5	7
215	merrell, sylvia bereknyei	2	4	13
216	meschia, james f.	2	8	23
217	miller, alexandra	2	10	32
218	milligan, tracey a.	2	29	10
219	minen, mia t.	2	12	10
220	mink, jonathan w.	2	12	16
221	mocco, j.	2	56	28
222	mooney, christopher j.	2	11	11
223	moonis, gul	2	515	33
224	moro, elena	2	17	14
225	mueller, e.	2	67	11
226	murphy, sarah a.	2	29	22
227	myers, matthew a.	2	33	21
228	nemati, hamid	2	5	5
229	nevel, kathryn s.	2	17	15
230	nickels, katherine	2	8	13
231	nitrini, ricardo	2	8	16
232	niznick, naomi	2	6	12
233	nnacheta, lorraine c.	2	515	33
234	norbury, john w.	2	11	12
235	pandian, jeyaraj d.	2	11	11
236	poling, gayla l.	2	515	33
237	radecki, linda	2	27	31
238	rassaf, tienush	2	7	17
239	robbins, nathaniel m.	2	27	7
240	roberts, j. kirk	2	515	33
241	rosen, noah	2	10	4
242	rosen, noah l.	2	14	8
243	sacco, ralph l.	2	13	18
244	sachdev, rani	2	4	24
245	sadler, iwan	2	4	21
246	sampson, margaret	2	69	6
247	sarewitz, ellen	2	4	21
248	satterfield, lisa	2	515	33
249	sauerbier, anna	2	13	17
250	scaravilli, t	2	20	10
251	scheiber, sc	2	33	5
252	scheiber, stephen c.	2	5	6
253	schellekens, harriet	2	71	7
254	schonrock-adema, johanna	2	31	10
255	schuh, l. a.	2	56	12
256	schuh, lori a.	2	51	8
257	schwartz, seth r.	2	515	33
258	selai, c.	2	29	8
259	sellmann, timur	2	7	17
260	sellner, j.	2	39	9
261	shutter, lori	2	10	6
262	siegel, jason l.	2	10	21
263	sillau, stefan	2	6	10
264	simpson, deborah	2	172	8
265	sivaswamy, lalitha	2	9	9
266	smith, sam	2	4	21
267	solomou, georgios	2	14	22
268	sotgiu, maria alessandra	2	48	20
269	stabio, maureen e.	2	48	7
270	stachler, robert j.	2	515	33
271	stern, barney j.	2	23	11
272	stern, theodore a.	2	12	2
273	stewart, max	2	4	21
274	strowd, roy	2	7	22
275	struhal, w.	2	39	9
276	suarez, jose i.	2	20	10
277	suhoyo, yoyo	2	31	10
278	tan, mehtap	2	33	2
279	tarolli, christopher g.	2	43	2
280	thal, serge c.	2	7	17
281	thomas, ronald	2	9	9
282	tinazzi, michele	2	12	23
283	tiryaki, ezgi	2	13	10
284	topjian, alexis a.	2	7	37
285	toulouse, andre	2	71	7
286	valencia, ignacio	2	18	7
287	venance, shannon l.	2	6	8
288	wainwright, mark s.	2	7	37
289	wang, fan	2	7	16
290	waugh, jeff l.	2	59	8
291	weber, daniel j.	2	28	2
292	weisleder, pedro	2	2	6
293	wetzchewald, dietmar	2	7	17
294	whitehouse, sarah	2	13	5
295	willison, alice	2	4	21
296	wirrell, elaine	2	31	13
297	wolf, david s.	2	3	11
298	wu, bo	2	17	23
299	wusthoff, courtney j.	2	14	19
300	yager, joel	2	6	2
301	yin, han	2	48	9
302	zeitler, daniel m.	2	515	33
303	zhang, wei	2	75	8
304	zhao, jianhua	2	7	16
305	aarts, johanna w. m.	1	3	9
306	abali, saygin	1	4	4
307	abdallah, rany	1	7	7
308	abdallah, rany t.	1	1	14
309	abdi, hamidreza	1	7	7
310	abdou, sherif	1	44	4
311	abdulkarim, hanadi a.	1	27	6
312	abend, nicholas s.	1	4	16
313	abola, ramon	1	0	4
314	abou-fayssal, nada	1	34	5
315	abouqual, redouane	1	4	4
316	abraham, danielle s.	1	2	7
317	abraham, michael g.	1	36	6
318	abraham, rtika ryfka	1	7	7
319	abramovitch, anna	1	5	4
320	abrantes, jefferson	1	25	2
321	abras, chadia	1	0	7
322	abu alneaj, muhammad	1	0	9
323	abu libdeh, amal	1	5	2
324	abu-sawwa, renad	1	2	2
325	abuzinadah, ahmad rida	1	4	1
326	acciarresi, monica	1	16	14
327	achike, francis	1	5	2
328	achkar, angie h.	1	5	5
329	adair, j. c.	1	32	5
330	adam, o. r.	1	9	5
331	adamowski, se	1	24	2
332	adams, h. p.	1	8	4
333	adams, hp	1	9	3
334	adams, meredith e.	1	7	1
335	adams, nellie r.	1	3	1
336	adamu, sheila	1	43	3
337	afazel, shahrzad	1	2	6
338	afshari, mitra	1	21	2
339	agarwal, mohit	1	13	8
340	agarwal, parul	1	4	4
341	agarwal, prateek	1	9	8
342	agarwal, shashank	1	34	5
343	aguirre, jesus	1	10	13
344	ahmad, amina	1	11	4
345	ahmed, iqbal	1	6	6
346	ahmed, tazeen	1	4	3
347	ahn, js	1	31	5
348	aitken, gill	1	2	2
349	aiyer, meenakshy	1	66	12
350	ajzen, sergio aron	1	1	5
351	akaboshi, shinjiro	1	3	11
352	akca, ozan	1	5	8
353	akin, ezgi ozalp	1	1	2
354	akinyemi, rufus o.	1	16	14
355	akpinar, elif	1	7	2
356	al-ahmari, ahmed	1	34	6
357	al-attas, alawi a.	1	1	7
358	al-awary, bassam hassan	1	12	4
359	al-darsani, zeinah	1	19	4
360	al-dashash, fahad	1	34	6
361	al-harthi, mohammed e.	1	9	8
362	al-hussain, fawaz	1	34	6
363	al-jishi, adel	1	17	4
364	al-masnour, firas	1	34	6
365	al-mufti, fawaz	1	7	15
366	al-muhanna, fahd abdulaziz	1	12	4
367	al-rubaish, abdullah mohammed	1	12	4
368	al-shaikh, basil abdulrahman	1	12	4
369	al-umran, khalid umran	1	12	4
370	alam, r	1	29	4
371	alamowitch, s.	1	14	8
372	alamowitch, sonia	1	11	16
373	alanazi, ali	1	1	7
374	albaker, oj	1	18	6
375	albers, bert	1	4	8
376	albin, roger l.	1	5	3
377	alchab, samer	1	7	8
378	aldabbagh, yousif	1	0	10
379	aldahi, ahmed s.	1	1	7
380	aldayel, abdulaziz a.	1	9	8
381	aldayel, abdulrahman y.	1	9	8
382	aldisi, walaa m.	1	27	6
383	alduaij, khalid o.	1	9	8
384	alexiou, jean	1	2	10
385	algahtani, hussein a.	1	1	1
386	alhelali, haneen a.	1	27	6
387	alhelo, rawia f.	1	27	6
388	ali, f. r.	1	0	4
389	ali, imran	1	26	9
390	alimoglu, mustafa kemal	1	24	2
391	alizadeh-khoei, mahtab	1	9	5
392	aljohani, abdulaziz s.	1	2	2
393	aljumah, talal k.	1	1	7
394	alkhachroum, ayham	1	6	13
395	alkhathlan, mujahed a.	1	9	8
396	allan, w	1	62	5
397	allen, kate	1	5	0
398	allen, lauren k.	1	49	2
399	allespach, heidi	1	6	13
400	allman, alexandra	1	0	4
401	allred, elizabeth n.	1	10	5
402	almalki, mohammed	1	2	10
403	almeida, jacqueline m.	1	11	2
404	alqahtani, ahmed a.	1	1	7
405	alshammari, mohammed a.	1	1	7
406	alshareef, fahad g.	1	9	8
407	alshareef, saad m.	1	9	8
408	alshekhlee, amer	1	26	4
409	altaher, hibatallah	1	0	10
410	alty, j.	1	3	4
411	ambuel, bruce	1	28	8
412	amenta, francesco	1	15	4
413	amer, yasser s.	1	1	7
414	americo, lisa	1	4	6
415	amidei, christina	1	8	3
416	amidei, christine	1	33	5
417	amin, nivee	1	5	4
418	aminalroaya, reyhaneh	1	9	5
419	aminoff, m. j.	1	15	9
420	amir, ofra	1	5	9
421	an, andrea	1	34	6
422	an, sookee	1	10	5
423	anand, a.	1	30	3
424	anand, akshay	1	5	5
425	anbu, deepika	1	15	7
426	ances, beau	1	5	0
427	anderson, eric r.	1	41	11
428	anderson, heather s.	1	12	11
429	anderson, m. brownell	1	162	5
430	anderson, matthew n.	1	10	13
431	anderson, mr	1	62	2
432	anderson, wayne e.	1	3	17
433	ando, kohei	1	5	4
434	andrade, jose paulo	1	31	1
435	andren, kerstin	1	1	3
436	andrews, h	1	76	11
437	ankrom, christy	1	28	7
438	annushkin, vladislav	1	5	8
439	ansakorpi, hanna	1	7	2
440	ansoanuur, george	1	0	5
441	antar, albert	1	21	7
442	antoniadis, g.	1	4	13
443	antonio, aileen a.	1	0	5
444	antony, arun r.	1	8	3
445	anuja, patil	1	23	7
446	anwar, shimaa a. m.	1	1	7
447	anwer, sanam	1	0	4
448	apke, tonya l.	1	8	2
449	appelbaum, rachel	1	13	4
450	appleton, richard	1	12	1
451	arain, amir	1	20	15
452	archer, neil d.	1	0	8
453	archuleta, pattie	1	13	14
454	ariza, ingrid estrada	1	2	10
455	armbrust, tamyra l.	1	1	5
456	arnardottir, erna-sif	1	10	18
457	arraez-aybar, luis-alfonso	1	5	15
458	arsic, stojanka	1	5	15
459	arzimanoglou, alexis	1	28	11
460	asch, steven m.	1	5	9
461	asghari, fariba	1	12	2
462	ashraf, v. v.	1	31	4
463	astete, yanet	1	2	19
464	asthana, sanjay	1	4	16
465	asukile, melody	1	5	7
466	ataoglu, beyzanur	1	2	6
467	atlas, sw	1	37	5
468	atoum, adnan	1	17	4
469	atteyah, daniah m.	1	27	6
470	atwal, amanbir	1	0	6
471	aung, wint y.	1	34	5
472	aung, yan lynn	1	3	9
473	autier, l.	1	11	6
474	auvin, stephane	1	28	11
475	avasarala, sameer	1	5	3
476	avasarala, sameer k.	1	8	2
477	avetisyan, kristine	1	8	9
478	avidan, alon y.	1	26	9
479	awad, ahmed j.	1	15	10
480	awadh, pandit	1	23	7
481	awuah, dominic	1	43	3
482	aydinli, nur	1	4	4
483	aye, yin minn	1	3	9
484	aygun, remzi	1	0	8
485	ayhan, sadiye	1	0	6
486	aymon, ramisha	1	0	7
487	ayodele, olugbenga e.	1	18	2
488	aziz, maged	1	7	7
489	azman, drazen	1	3	7
490	babio, nancy	1	3	5
491	babool, sofia	1	14	4
492	baccin, camila rosalia antunes	1	0	9
493	bacharach, rae	1	0	1
494	backhaus, tilo	1	7	2
495	badawi, nadia	1	9	8
496	baek, jang-hyun	1	10	11
497	baek, william s.	1	7	2
498	baessler, franziska	1	8	15
499	bagenstos, samuel r.	1	20	2
500	bahia, valeria santoro	1	1	11
501	bahiri, rachid	1	4	4
502	bahra, a	1	103	1
503	bahrami, mohammad hasan	1	7	4
504	baker, mg	1	5	4
505	bakulin, ilya	1	5	8
506	balasanova, alena a.	1	4	2
507	balasooriya, chinthaka	1	0	8
508	baldwin, matthew r.	1	19	4
509	bale, james f.	1	15	6
510	balicza, peter	1	3	8
511	ball, jean	1	1	11
512	ball, stephen	1	18	4
513	baloyannis, s.	1	10	7
514	balthazar, marcio luiz figueredo	1	1	11
515	bance, l.	1	16	6
516	bandiera, pasquale	1	43	5
517	bank, anna m.	1	171	7
518	bankiewicz, krystof s.	1	15	4
519	banks, matthew k.	1	1	5
520	bansal, tino	1	7	7
521	baptista, luciana de padua silva	1	1	5
522	baranano, kristin	1	201	7
523	barat, atena	1	5	2
524	barbato, francesco	1	6	8
525	barbato, kelly biancardini gomes	1	0	2
526	barbosa, breno jose alencar pires	1	1	11
527	barbosa, joselina maria	1	9	2
528	barbosa, william	1	2	19
529	barclay, krista	1	0	6
530	barea-moya, lucas	1	0	3
531	barker, roger a.	1	0	5
532	barker, wh	1	17	2
533	barker-collo, s.	1	10	21
534	barks, mary c.	1	6	5
535	barlow, james	1	16	3
536	barnes, stacy	1	4	16
537	baroque, alejandro c., ii	1	2	2
538	barratt, jessica	1	4	6
539	barrett, kevin m.	1	7	13
540	barrios-anderson, adriel	1	10	13
541	barrowman, nick	1	69	3
542	barsan, william g.	1	9	7
543	bartels, josef	1	19	2
544	barton, c	1	6	2
545	bartos, a	1	13	6
546	bass, nancy	1	4	12
547	bassett-gunter, rebecca	1	4	5
548	bassetti, claudio	1	10	18
549	bastos, ricardo rocha	1	1	4
550	battat, robert	1	13	8
551	battineni, gopi	1	15	4
552	batun, kerim deniz	1	2	6
553	bayer, steffen	1	16	3
554	bayram, f. buket	1	0	6
555	beach, thomas g.	1	52	3
556	beal, jules c.	1	3	2
557	beard, jennifer	1	15	3
558	beavis, erin	1	4	12
559	becerra, adriana	1	5	9
560	becker, j. t.	1	138	9
561	bederson, joshua b.	1	15	10
562	bedward, j	1	35	4
563	beehler, gregory p.	1	0	2
564	beggs, sean	1	0	8
565	beghi, ettore	1	10	21
566	behfar, atta	1	4	7
567	behnam-terneus, maria	1	5	7
568	beighley, jennifer s.	1	8	17
569	bell, alicia m.	1	11	2
570	bell, rodney d.	1	12	7
571	bellhaeuser, henrik	1	2	13
572	benamer, hani t. s.	1	0	1
573	benassai, michelle	1	2	19
574	benditt, dg	1	30	6
575	bendtsen, lars	1	23	6
576	benekos, erin	1	11	8
577	bengner, thomas	1	7	3
578	benjamin, daniel m.	1	0	5
579	benko, william s.	1	23	9
580	bennett, d.	1	10	21
581	bensalem-owen, meriem	1	2	11
582	benstead, timothy	1	8	3
583	benvie, s	1	27	8
584	beovic, b.	1	13	8
585	beraud, g.	1	13	8
586	berberat, pascal o.	1	1	5
587	berendse, h. w.	1	21	8
588	beres, shannon	1	3	8
589	berg, anne t.	1	3	2
590	berg, geraldine	1	22	4
591	berg, robert a.	1	37	10
592	bergen, dc	1	48	0
593	bergen, donna c.	1	30	1
594	bergethon, peter r.	1	134	2
595	bergiannaki, jd	1	2	4
596	bergin, ann m.	1	2	4
597	berkman, mehmet zafer	1	7	2
598	berkowitz, aaron l.	1	5	1
599	bernard-fuentes, napoleon	1	8	16
600	bernardo, antonio	1	3	7
601	bernson-leung, miya	1	1	6
602	bernson-leung, miya e.	1	4	1
603	bernson-leung, miya elizabeth	1	42	8
604	berthaud, jimmy, v	1	14	11
605	bertrand, me	1	18	6
606	best, james	1	4	14
607	best, stephanie	1	4	12
608	betts, kourtney	1	10	4
609	beversdorf, david q.	1	3	1
610	bhadhprasit, wattanaporn	1	35	2
611	bhai, salman f.	1	14	4
612	bhatia, kailash p.	1	5	5
613	bhatnagar, saurabha	1	171	7
614	bhattacharyya, neil	1	24	1
615	bhidayasiri, roongroj	1	5	5
616	bhoj, elizabeth j.	1	8	17
617	bickel, horst	1	78	6
618	bickel, jennifer	1	3	1
619	bieber, j	1	24	4
620	biesalski, anne-sophie	1	2	3
621	bilic, ivica	1	1	2
622	bin dahmash, abdulmajeed	1	9	8
623	bindoff, a.	1	3	4
624	binkley, michael	1	5	8
625	binkley, michael m.	1	3	3
626	biondo, andrew	1	34	6
627	birbeck, gl	1	56	0
628	birchall, cara	1	15	7
629	birkle, sarah	1	8	15
630	biroli, matteo	1	12	5
631	biskup, ewelina maria	1	8	15
632	biswas, sagnik	1	4	9
633	black, asa c., jr.	1	8	12
634	black, leigh-ann	1	8	12
635	blackhall, leslie	1	42	4
636	blackwood, r. alexander	1	5	5
637	blacquiere, dylan	1	4	6
638	blaginykh, elena	1	5	5
639	blaich, raymond	1	4	3
640	blais, angelica	1	10	20
641	blank, leah	1	4	4
642	blaschke, anna-lena	1	1	5
643	blatt, amy e.	1	4	7
644	blauwet, cheri a.	1	171	7
645	blazquez-llorca, lidia	1	1	12
646	bleh, c	1	18	4
647	blennow, kaj	1	36	14
648	bligh, emily	1	7	10
649	blissitt, patricia a.	1	2	7
650	block, sd	1	61	1
651	block, susan	1	28	8
652	bloem, bastiaan r.	1	8	5
653	blood, angela	1	3	3
654	boafo, addo	1	10	20
655	boak, duncan	1	18	4
656	boas magalhaes, lucas vilas	1	1	4
657	bocci, tommaso	1	2	4
658	bodensteiner, john	1	4	12
659	boes, christopher j.	1	5	3
660	boggild, miranda	1	30	1
661	bohnen, nicolaas i.	1	5	3
662	bolen, shari	1	59	5
663	boller, f.	1	2	4
664	bolukbasi, selcuk	1	0	8
665	bombaci, alessandro	1	6	8
666	bonaroti, alisha	1	13	4
667	bonetti, bruno	1	10	21
668	bongiorno, diana m.	1	5	11
669	bongsebandhu-phubhakdi, saknan	1	4	5
670	bonifati, domenico marco	1	10	21
671	bonilha, leonardo	1	20	15
672	bonkowsky, joshua l.	1	14	17
673	bonnie, richard j.	1	16	6
674	bonomo, yvonne ann	1	16	2
675	boon, paul	1	39	10
676	bootsma, jael	1	2	5
677	bor, david	1	191	3
678	bora, samudragupta	1	4	14
679	boreskie, patrick e.	1	7	15
680	borghans, ine	1	39	3
681	borgos, marlana j.	1	17	7
682	borhani-haghighi, afshin	1	9	4
683	bosanquet, margot	1	1	7
684	bose, shiti	1	4	4
685	bosman, marius c.	1	1	2
686	boss, renee d.	1	11	6
687	boudali, aziza	1	4	4
688	boulet, john	1	6	2
689	bowers, christian g.	1	1	10
690	bowley, michael p.	1	1	7
691	boyd, roslyn n.	1	1	7
692	boyer, philip j.	1	10	7
693	boyette, deborah	1	3	7
694	boyle, abbey	1	7	10
695	bracher, l	1	27	8
696	bradley, wg	1	24	4
697	braicu, alina	1	8	15
698	brainin, m.	1	10	21
699	brainin, michael	1	16	14
700	braksick, sherri	1	5	6
701	braksick, sherri a.	1	17	2
702	branch, erika	1	9	5
703	brandao de mello, carlos eduardo	1	25	2
704	brandao, leonardo r.	1	10	20
705	brandstadter, rachel	1	2	6
706	brandtoenies, simone	1	48	1
707	brannigan, jamie f. m.	1	0	11
708	brasel, karen	1	28	8
709	brassil, michelle	1	4	2
710	brauer, sandra g.	1	37	8
711	braun, mario	1	2	13
712	brechtel, leanne e.	1	8	12
713	brem, henry	1	21	7
714	bremmer, jarrett	1	1	6
715	brenner, erich	1	5	15
716	brennum, jannick	1	23	6
717	brewer, timothy f.	1	13	8
718	bricker, leslie	1	34	6
719	bridge, patrick d.	1	4	11
720	briggs, nancy	1	0	12
721	brint, su	1	19	2
722	bristowe, katherine	1	10	6
723	britton, jeffrey w.	1	2	11
724	brock, dylan	1	3	2
725	brodkey, amy	1	15	8
726	broner, susan	1	11	4
727	brooks, m.	1	5	4
728	broshek, donna k.	1	15	3
729	brott, thomas g.	1	1	10
730	broussolle, e.	1	2	4
731	brown, allen	1	10	21
732	brown, benjamin l.	1	3	8
733	brown, devin l.	1	9	7
734	brown, diane	1	10	3
735	brown, judith b.	1	30	1
736	brown, lawrence	1	13	14
737	brown, peter	1	5	5
738	brown, richard	1	16	24
739	brown, robert d., jr.	1	1	10
740	brown, sherry-ann	1	10	0
741	browne, marybeth	1	13	4
742	bruce, jeffrey n.	1	12	5
743	brucki, sonia maria dozzi	1	1	11
744	bruestle, peter	1	17	4
745	bubrick, ellen j.	1	11	6
746	buchhalter, j. r.	1	57	6
747	buchhalter, jeffrey	1	39	1
748	buckholz, adam p.	1	2	10
749	buckingham, will	1	4	16
750	budakoglu, i. irem	1	0	8
751	budhu, j.	1	1	2
752	budhu, joshua a.	1	1	7
753	bueno campana, m.	1	13	5
754	bueno-lopez, jose luis	1	5	15
755	buford, john	1	8	2
756	buggenhagen, holger	1	2	13
757	bujoreanu, simona	1	42	8
758	bukumiric, zoran	1	24	3
759	buras, matthew r.	1	1	4
760	burch, jaclyn e.	1	4	7
761	burdette, david e.	1	8	3
762	bure, annelly	1	6	13
763	bureau, britta l.	1	11	3
764	burgess, annette	1	0	5
765	burke, s	1	35	4
766	burke, sarah	1	15	3
767	burkhardt, john c.	1	4	11
768	burlina, alessandro	1	10	21
769	burns, jeffrey p.	1	15	2
770	burns, ted	1	4	3
771	busis, neil	1	28	0
772	busque, katherine	1	2	2
773	butler, andrew c.	1	34	5
774	bye, ann m. e.	1	0	12
775	bye, ann me	1	0	8
776	bye, annie	1	4	12
777	byler, d.	1	0	2
778	byrne, richard w.	1	25	6
779	caccavella, valerio maria	1	30	8
780	cagnin, annachiara	1	10	21
781	cahill, jonathan	1	0	2
782	cai, chunyan	1	28	7
783	calabria, francesca	1	10	21
784	callaghan, shauna	1	52	5
785	callanan, ian	1	0	4
786	callison, r. c.	1	8	4
787	camargo, isabel	1	2	19
788	campbell, bruce	1	16	14
789	campbell, peter g.	1	12	7
790	campiglio, laura	1	2	4
791	canevini, maria paola	1	23	4
792	cannarozzi, maria	1	66	12
793	cao minh chau	1	9	8
794	cao, michelle t.	1	9	1
795	caparo-zamalloa, cesar	1	3	6
796	capelle, h. holger	1	3	5
797	capobianco, d. j.	1	16	6
798	capobianco, david j.	1	5	3
799	cappucci, stefanie p.	1	6	6
800	caprio, timothy	1	157	5
801	capron, jean	1	11	16
802	caputi, n.	1	2	4
803	carabenciov, ivan d.	1	11	3
804	caramelli, paulo	1	1	11
805	carey, andrew r.	1	0	5
806	carey, aoife	1	1	8
807	carey, irene	1	10	6
808	carey, john c.	1	8	17
809	carle, g.	1	11	6
810	carlson, chad e.	1	9	1
811	carlsson, cynthia m.	1	4	16
812	carmichael, sw	1	29	4
813	carone, marco	1	130	6
814	carotenuto, anna	1	15	4
815	carozza, richard b.	1	0	3
816	carpenter, jessica l.	1	3	21
817	carpentier, josee	1	2	6
818	carpinelli, anne	1	11	8
819	carr, sandra e.	1	4	2
820	carrie, sean	1	18	4
821	carroll, elizabeth	1	0	2
822	carroll, linda	1	16	24
823	carruthers, robert	1	0	6
824	carson, alan	1	8	3
825	carson, robert p.	1	0	3
826	carter, jonathan l.	1	12	11
827	caruso, andrew	1	2	7
828	carvalho, v	1	21	8
829	case, s	1	12	2
830	caselli, richard j.	1	52	3
831	cashion, nathan	1	16	24
832	casolla, b.	1	0	0
833	castejon, david	1	1	12
834	castillo, maria isabel	1	4	14
835	castonguay, alicia c.	1	36	6
836	castro, l. nicolas gonzalez	1	1	3
837	castro-suarez, sheila	1	3	6
838	catenaccio, eva	1	2	4
839	cawthorpe, david	1	8	16
840	cebral-loureda, manuel	1	2	3
841	cerioli, gabriele	1	23	4
842	cesaro, pierre	1	8	6
843	chacko, thomas v.	1	14	2
844	chadha, antonella santuccione	1	7	5
845	chadha, nisha	1	0	11
846	chaganty, saisunder shashank	1	4	2
847	chaiban, gassan	1	7	7
848	chakraborty, shelly	1	67	4
849	chakravarty, kamalesh	1	3	3
850	chambers, breah	1	12	2
851	chambless, lola b.	1	43	3
852	chan, chi	1	3	9
853	chan, sh	1	27	1
854	chan, teresa m.	1	7	15
855	chan, yee cheun	1	12	1
856	chan, yiong huak	1	58	5
857	chand, prem	1	0	6
858	chandra, p. prarthana	1	13	8
859	chandra, p. sarat	1	13	8
860	chang, angela t.	1	37	8
861	chang, celia h.	1	23	9
862	chang, chih-shiuh	1	9	2
863	chang, chun-wei	1	6	6
864	chang, jui-kun	1	13	8
865	chang, ku-chou	1	13	8
866	chang, ling-sai	1	1	3
867	chang, shu-hua	1	5	3
868	chang, taeun	1	13	5
869	chang, yeu-jhy	1	6	6
870	chang, yung-wei	1	0	1
871	chao, c	1	5	8
872	chao, steven z.	1	15	12
873	charles, p. david	1	5	4
874	charleston, larry	1	20	7
875	charney, dennis s.	1	3	9
876	chasen, stephen	1	5	4
877	chatfield, mark	1	5	10
878	chau, destiny f.	1	15	2
879	chaudhary, amna mohyud din	1	9	4
880	chaudhry, saqib a.	1	3	6
881	chavan, roshan	1	1	3
882	chazot, p.	1	10	21
883	chemali, zeina n.	1	0	9
884	chen, annie v.	1	0	4
885	chen, bin	1	3	5
886	chen, hsiao-mei	1	5	2
887	chen, jefferson w.	1	4	5
888	chen, jennifer	1	5	7
889	chen, lei-shih	1	9	5
890	chen, minglong	1	0	8
891	chen, wei-ju	1	9	5
892	chen, zhuohui	1	1	7
893	cheng, i-chen	1	9	2
894	cheng, kuei-yueh	1	13	8
895	cheng, xin	1	1	9
896	cheong, josepha a.	1	6	6
897	chetrit, a	1	9	4
898	cheung, joe	1	0	10
899	chhetri, suresh kumar	1	21	0
900	chi, lu-wen	1	5	3
901	chiang, sharon	1	8	3
902	chileuitt, abraham andres	1	6	13
903	chin, han xin	1	5	6
904	chin, nathaniel a.	1	4	16
905	chiperi, ramona	1	3	8
906	chirculescu, andy r. m.	1	5	15
907	chiriboga-salazar, nicolas r.	1	3	21
908	chishimba, lorraine	1	5	7
909	chiti, arturo	1	12	5
910	chiu, su-chen	1	13	8
911	chkonia, eka	1	8	9
912	cho, han-jin	1	10	11
913	cho, hyun ji	1	10	11
914	cho, tracey a.	1	2	1
915	choi, hojin	1	0	4
916	choi, hye-yeon	1	10	11
917	choi-kwon, s	1	31	5
918	chomba, mashina	1	5	7
919	chopra, ambica c.	1	6	5
920	chorney, elizabeth t.	1	28	1
921	chou, jingyuan	1	6	9
922	chou, roger	1	16	24
923	chowdhury, yasir a.	1	7	12
924	choy, nancy l. low	1	37	8
925	christie, suzanne	1	0	3
926	christopher-stine, lisa	1	14	4
927	chu, yunxiang	1	2	2
928	chua, beng choon	1	31	3
929	chuah, joon hao	1	9	5
930	chudgar, saumil	1	66	12
931	chum, m.	1	27	5
932	chum, marvin	1	2	2
933	chumas, paul	1	4	3
934	chung, chi-jung	1	52	8
935	chung, daniel y.	1	6	5
936	chung, mu-chi	1	52	8
937	chung, tae mo	1	5	5
938	chunga, natalia	1	2	19
939	chuquilin, miguel	1	15	12
940	church-nally, megan	1	9	5
941	cibula, jean e.	1	4	6
942	cimino, larry	1	8	16
943	cirignotta, fabio	1	10	18
944	cismondi, ines adriana	1	5	9
945	clapp, brian	1	4	8
946	clardy, stacey l.	1	4	3
947	clare, quentin	1	2	2
948	clark, lindsay r.	1	4	16
949	clarke, bart l.	1	1	5
950	clarkin, chantalle	1	36	6
951	clemens, conrad j.	1	48	4
952	clemons, sara	1	9	5
953	clifford, tammy	1	14	6
954	clough, j.	1	16	6
955	clynch, abigail	1	1	10
956	cock, hannah r.	1	24	4
957	codrington, wilfred u., iii	1	20	7
958	codron, p.	1	5	3
959	cofie, nicholas	1	27	4
960	cohen, abigail s.	1	5	11
961	cohen, alan r.	1	23	9
962	cohen, b.	1	138	9
963	cohen, dan	1	8	16
964	cohen, julie s.	1	201	7
965	coker, beray	1	0	6
966	cokley, jon	1	2	2
967	cole, jonathan	1	0	1
968	cole, kimberly a.	1	7	1
969	coleman, m.	1	17	4
970	coleman, mary	1	12	11
971	coleman, mary e.	1	23	3
972	colenda, cc	1	15	2
973	colenda, christopher c.	1	30	5
974	colletti, james e.	1	14	5
975	collins, christina i.	1	3	8
976	collins, sally	1	9	5
977	colosimo, carlo	1	5	5
978	combs, susan e.	1	8	6
979	comrie, alison	1	0	8
980	connelly, mark	1	3	1
981	connolly, michael	1	2	2
982	contreras-pulache, hans	1	0	2
983	conway, sarah e.	1	1	7
984	cook, calli	1	3	17
985	cook, elizabeth	1	14	17
986	cooke, lara	1	4	1
987	cooper, brian	1	14	5
988	cooper, lou ann	1	4	6
989	cooper, s. lewis	1	3	2
990	corbetta, maurizio	1	10	21
991	corboy, john r.	1	34	5
992	corcoran, jennifer	1	2	19
993	cork, r. john	1	15	3
994	cornejo-olivas, mario	1	3	6
995	cornes, susannah	1	6	9
996	cornett, patricia	1	9	5
997	corona-vazquez, t.	1	6	9
998	corrada, maria m.	1	19	4
999	cortelli, pietro	1	10	21
1000	corvalan, rhonda	1	14	17
1001	cosar, behcet	1	0	8
1002	cosic, gorana	1	2	4
1003	coskun, ozlem	1	0	8
1004	cosner, zoe l.	1	5	11
1005	costa, m. l.	1	0	2
1006	cote, l	1	76	11
1007	courtney, ellie	1	0	10
1008	coutinho, c. c.	1	0	2
1009	cover, michael t.	1	4	11
1010	coyle, doug	1	14	6
1011	crandell, sharon	1	15	3
1012	crawford, lindsay	1	27	4
1013	crean, michael	1	39	10
1014	crevits, l.	1	40	5
1015	crimmins, darach	1	4	3
1016	cristancho, sayra	1	2	1
1017	cristancho, sayra m.	1	11	5
1018	cronemberger andrade, alan	1	0	3
1019	cross, j. helen	1	28	11
1020	crossen, stephanie s.	1	23	9
1021	crowe, catherine	1	1	8
1022	crowell, jason	1	4	3
1023	crowley, aidan	1	4	7
1024	crumrine, p. k.	1	15	9
1025	cruz, gabriela bosmenier	1	10	5
1026	cruz, salvador	1	2	9
1027	cruz, tiana	1	0	7
1028	cruz-flores, s	1	18	6
1029	crystal, howard	1	28	3
1030	csabai, marta	1	1	2
1031	cuddy, monica m.	1	24	1
1032	cui, liying	1	1	9
1033	culler, george w.	1	8	7
1034	cumberland, denise m.	1	9	5
1035	cummings, kenneth c.	1	4	7
1036	cummins, robbie	1	1	6
1037	cunha, brenda silva	1	0	9
1038	cuninghame, sean	1	5	7
1039	curtis, caitrin m.	1	10	7
1040	cutrer, michael	1	11	3
1041	cutsforth-gregory, jeremy	1	5	6
1042	cyganek, agnieszka	1	2	6
1043	czech, jane m.	1	7	5
1044	czeisler, barry m.	1	11	2
1045	d'onofrio, gianluca	1	28	11
1046	d'ortho, marie-pia	1	10	18
1047	d'souza, caitlin e.	1	7	13
1048	da costa, mariana pinto	1	8	15
1049	da luz, dominique	1	5	3
1050	da silva aquino, emanuelle roberta	1	7	5
1051	da silva, leticia costa	1	1	11
1052	dacre, j	1	12	2
1053	dagnone, damon	1	27	4
1054	dalgic, aysegul isler	1	5	2
1055	daniello, kate m.	1	25	1
1056	daniels, vijay j.	1	0	3
1057	dannenberg, michelle	1	3	9
1058	danner, nicole	1	0	10
1059	darakhshan, naheed	1	23	7
1060	das, saurav	1	5	8
1061	davenport, richard j.	1	61	5
1062	davey, andrew r.	1	1	11
1063	davies, benjamin m.	1	0	11
1064	davis, frank m.	1	6	3
1065	davis, jessica m.	1	5	6
1066	davis, stephen	1	16	14
1067	davoody, nadia	1	6	1
1068	dawson, rachael a.	1	20	15
1069	day, arthur l.	1	41	18
1070	dayal, parul	1	23	9
1071	dayapoglu, nuray	1	29	1
1072	de biasia, f	1	9	7
1073	de falco, fabrizio a.	1	1	1
1074	de gusmao, claudio m.	1	42	8
1075	de jesus, pedro antonio pereira	1	0	9
1076	de laat, denise	1	10	20
1077	de leacy, reade	1	15	10
1078	de liege, a.	1	11	6
1079	de montellano, d. j. davila-ortiz	1	6	9
1080	de oliveira, andre g. f.	1	19	8
1081	de paul, ana lucia	1	5	9
1082	de paz, lubna morales	1	1	12
1083	de picker, livia	1	8	15
1084	de ribaupierre, sandrine	1	49	2
1085	de souza, fabio	1	0	2
1086	de souza, leonardo cruz	1	1	11
1087	de stefano, n	1	3	5
1088	de villers, kathryn tremolet	1	1	6
1089	de visser, marianne	1	7	5
1090	dean, brian c.	1	20	15
1091	deb, anindita	1	8	2
1092	debenedectis, carolyn	1	4	6
1093	deboer, scott	1	5	2
1094	defazio, giovanni	1	6	8
1095	degeorgia, michael	1	26	4
1096	degos, b.	1	11	6
1097	degu, amsalu	1	9	4
1098	deguise, marc-olivier	1	4	6
1099	dejean, deirdre	1	14	6
1100	dekosky, s. t.	1	15	9
1101	dekosky, steven t.	1	9	8
1102	delgado-lazo, victor	1	2	19
1103	delorme, cecile	1	11	16
1104	delozier, sarah j.	1	1	5
1105	demarin, vida	1	3	7
1106	demartino, erin s.	1	4	7
1107	demeulemeester, christine	1	36	6
1108	demirkan, kutay	1	2	2
1109	demirkaya, mithat	1	6	4
1110	dempsey, john s.	1	2	7
1111	denislic, m.	1	10	7
1112	denson, kathryn	1	10	3
1113	dent, ja	1	27	8
1114	deprins, judith	1	6	3
1115	derdeyn, colin p.	1	41	18
1116	dergham, ali	1	7	7
1117	dericioglu, nese	1	2	2
1118	dernaerschalk, bart m.	1	2	1
1119	desai, shivang	1	4	5
1120	desbiens, r	1	11	6
1121	deshpande, richa	1	3	9
1122	deuschl, g.	1	21	8
1123	dewar, g	1	27	8
1124	dhar, shweta u.	1	9	5
1125	dharaneeswaran, kiruba	1	6	4
1126	dhillon, sudeepa	1	4	4
1127	di liberto, g.	1	21	8
1128	di lorenzo, francesco	1	6	8
1129	di rezze, briano	1	2	5
1130	di vico, ilaria	1	2	2
1131	dias, marisa casanova	1	8	15
1132	diaz-torres, marco a.	1	14	5
1133	dib, georgette s.	1	0	9
1134	dicaprio, matthew r.	1	5	2
1135	dicianno, brad e.	1	4	2
1136	diem kieu tran	1	4	5
1137	diener, hans-christoph	1	4	8
1138	digiovanni, benedict f.	1	36	3
1139	dilullo, camille	1	142	2
1140	ding, joy z.	1	2	6
1141	ding, kan	1	20	15
1142	ding, ting	1	2	3
1143	disabella, marc	1	0	3
1144	disanto, giulio	1	61	5
1145	diwanji, devan	1	0	8
1146	dixon, joanne	1	18	4
1147	dixon, sarah m.	1	3	3
1148	djuric, predrag	1	2	4
1149	do prado, gilmar fernandes	1	7	5
1150	do, jeffrey	1	10	20
1151	doddamani, ramesh	1	13	8
1152	dodick, d. w.	1	16	6
1153	dogas, zoran	1	10	18
1154	doherty, k.	1	3	4
1155	doherty, mj	1	22	2
1156	domingues, renan barros	1	7	5
1157	dominguez-carral, j.	1	13	5
1158	donald, tyhiesia	1	8	17
1159	dong, hongmei	1	14	5
1160	dong, x.	1	125	5
1161	donner, e. j.	1	57	6
1162	dorriz, parasto	1	11	8
1163	doucette, heidi	1	11	6
1164	dougherty, ds	1	4	3
1165	doughty, c.	1	1	2
1166	douglas, vanja c.	1	22	4
1167	douglass, laurie m.	1	4	3
1168	dousak, m.	1	13	8
1169	dow, belinda	1	4	14
1170	dowell, j	1	27	8
1171	dowie, a	1	27	8
1172	dowlatshahi, dar	1	16	14
1173	downing, steven m.	1	47	2
1174	draconi, crys	1	4	12
1175	drake, richard l.	1	189	1
1176	drake, rl	1	9	1
1177	drake, sean	1	5	3
1178	drake, sean m.	1	8	2
1179	drapkin, zachary a.	1	38	3
1180	draskovic, maja	1	24	3
1181	dreesens, dunja	1	3	9
1182	drislane, frank w.	1	0	1
1183	drogan, o.	1	32	5
1184	drogan, oksana	1	12	11
1185	dubey, abhishek	1	7	2
1186	duenne, a. a.	1	7	5
1187	duetsch, m. a.	1	44	5
1188	dugandzija, tihomir	1	2	4
1189	duguet, a.	1	14	8
1190	duguet, alexandre	1	11	16
1191	duica, kelly	1	3	8
1192	duke, elizabeth s.	1	4	12
1193	duman, ozgur	1	5	2
1194	dunaway, ga	1	12	1
1195	dunn, laura b.	1	30	5
1196	dupont, sophie	1	28	11
1197	durack, jc	1	5	8
1198	durduran, turgut	1	4	6
1199	duron, r. m.	1	5	4
1200	duvivier, robbert j.	1	6	2
1201	dwivedi, sada nand	1	5	10
1202	dworetzky, barbara a.	1	11	6
1203	dyrbye, liselotte n.	1	11	3
1204	dzeng, elizabeth	1	19	4
1205	dütsch, m	1	18	4
1206	eady, kaylee	1	36	6
1207	eagleson, roy	1	49	2
1208	easley, kirk	1	12	3
1209	eaton, silviya h. m.	1	1	7
1210	eberspaecher, stefan	1	16	24
1211	eble, tanya n.	1	9	5
1212	ebong, ima m.	1	5	8
1213	ecos quispe, rosa lizbeth	1	10	5
1214	edgar, laura a.	1	0	10
1215	edouard, mark	1	0	11
1216	edwards, angela f.	1	4	7
1217	edwards, jonathan c.	1	20	15
1218	edwards-bailey, andrew	1	7	10
1219	eggers, scott d. z.	1	5	3
1220	eidelman, benjamin h.	1	7	13
1221	eikens, m.	1	5	7
1222	ekenze, o. s.	1	6	6
1223	ekhtman, jane	1	0	7
1224	ekici, baris	1	4	4
1225	el khoury, ramy	1	36	6
1226	elbeheiry, ahmed	1	1	7
1227	elder, j. bradley	1	15	4
1228	elhefnawy, yasmine	1	4	3
1229	elkind, mitchell s. v.	1	27	0
1230	elleker, mg	1	11	6
1231	ellingwood, s	1	62	5
1232	elliott, elizabeth j.	1	9	8
1233	elliott, jesse	1	14	6
1234	ellis, dg	1	17	1
1235	ellrichmann, gisa	1	2	3
1236	elnicki, d. michael	1	66	12
1237	elnicki, dm	1	12	2
1238	elsakka, elham e.	1	1	7
1239	elsea, sarah h.	1	8	17
1240	elwyn, glyn	1	3	9
1241	ely, janet	1	5	2
1242	emilia, ova	1	19	6
1243	eminoglu, fatma tuba	1	1	2
1244	emoto, y	1	2	20
1245	encandela, john	1	5	2
1246	endres, mathias	1	39	10
1247	engelborghs, sebastiaan	1	36	14
1248	engelbrecht, reginald	1	16	24
1249	engelholm, jean-luc	1	2	10
1250	englander, robert	1	10	5
1251	english, coralie	1	16	14
1252	epelbaum, stephane	1	11	16
1253	ephgrave, kimberly	1	15	8
1254	epling, joel p.	1	0	5
1255	epstein, leon	1	16	6
1256	epstein, ronald	1	8	4
1257	ercoli, tommaso	1	6	8
1258	erdi-krausz, gergo	1	0	10
1259	erdman, mary kate	1	13	4
1260	erdogan, semra	1	23	4
1261	erickson, jay c.	1	7	3
1262	ernst, ann-kathrin	1	2	3
1263	ernste, floranne c.	1	7	4
1264	ertsey, c	1	13	6
1265	eryilmaz, muhammed selim	1	2	6
1266	esenboga, tolga	1	0	6
1267	eshiet, unyime	1	9	2
1268	eshiet, unyime israel	1	7	2
1269	eshraghi, yashar	1	1	14
1270	espinoza-lecca, eduardo	1	0	2
1271	estevez, maureen e.	1	134	2
1272	etemadi, samaneh	1	9	4
1273	eubanks, james e.	1	10	7
1274	evangelista, eva	1	8	6
1275	evans, d. a.	1	125	5
1276	evans, r. e.	1	8	2
1277	evans, r. w.	1	8	2
1278	evans, sean j.	1	5	1
1279	evers, s.	1	10	21
1280	evins, alexander i.	1	3	7
1281	ewunetei, amien	1	9	4
1282	ezeala-adikaibe, b. a.	1	6	6
1283	ezeala-adikaibe, n. p.	1	6	6
1284	ezequiel, oscarina s.	1	19	8
1285	facheris, m	1	11	3
1286	fadayevatan, reza	1	9	5
1287	fadilah, ala	1	2	2
1288	fahn, s	1	76	11
1289	faingold, cl	1	12	1
1290	fair, jm	1	125	3
1291	faiz, kashif waqar	1	4	6
1292	falchook, a.	1	24	7
1293	falowski, steven	1	7	7
1294	fan, e	1	37	5
1295	fan, jessica h.	1	6	3
1296	fan, yanzhu	1	7	9
1297	fan, yishu	1	1	7
1298	fang, shoufan	1	28	3
1299	fara, michael g. g.	1	0	11
1300	farach, laura s.	1	5	6
1301	fard, nazila nikravan	1	12	2
1302	farkas, nathan	1	5	8
1303	farmer, elizabeth	1	1	7
1304	farndon, p	1	35	4
1305	farndon, peter	1	15	3
1306	farouk, samira s. s.	1	0	11
1307	farrow, tom	1	0	10
1308	fasanaro, angiola maria	1	15	4
1309	fatemi, ali	1	201	7
1310	faulk, clinton	1	1	5
1311	faulkner, l. r.	1	15	9
1312	faulkner, rakiya v.	1	8	12
1313	faustino, patricia ribeiro	1	0	3
1314	fawaz, cherine n.	1	0	9
1315	fawns, tim	1	9	1
1316	fazekas, f	1	3	5
1317	federico, paolo	1	4	9
1318	feghali, james	1	21	7
1319	feigin, valery	1	10	21
1320	feldman, brian	1	10	20
1321	felix, heidi m.	1	3	8
1322	felker, marcia	1	4	12
1323	felker, marcia, v	1	0	10
1324	felton, elizabeth a.	1	5	3
1325	fenelon, gilles	1	8	6
1326	ferguson, kris	1	1	14
1327	ferguson, kristi	1	15	8
1328	fernandes, paula teixeira	1	1	4
1329	fernandez, andres	1	3	11
1330	fernandez, elmer andres	1	5	9
1331	fernandez-valle, maria e.	1	1	12
1332	ferrara, j. m.	1	9	5
1333	ferrazzano, peter a.	1	3	21
1334	ferreira magalhaes, daniel de souza	1	1	4
1335	ferreira, maria amelia	1	9	2
1336	ferretti, maria teresa	1	7	5
1337	fiandaca, massimo s.	1	15	4
1338	fida, nm	1	11	1
1339	figlin, e	1	9	4
1340	figueroa, karla p.	1	8	17
1341	figueroa, stephen a.	1	5	11
1342	filipcic, igor	1	8	16
1343	filipovic-grcic, petar	1	1	2
1344	filippi, m	1	3	5
1345	findlay, jm	1	11	6
1346	fink, matthew e.	1	2	10
1347	finlayson, a. e.	1	0	4
1348	finney, g. r.	1	24	7
1349	finney, glen r.	1	12	11
1350	finnstrom, o. orvar	1	45	5
1351	fins, joseph j.	1	20	2
1352	finsterer, j.	1	4	13
1353	fiorio, mirta	1	10	21
1354	firat, oguzhan	1	2	2
1355	fischer, elisabeth	1	0	5
1356	fischer, m. r. g.	1	7	5
1357	fischer, melissa	1	8	2
1358	fitzhenry, sarah	1	4	6
1359	flamand-roze, c.	1	14	8
1360	flamand-roze, constance	1	11	16
1361	flanagan, eoin p.	1	142	4
1362	flanigan, joseph	1	5	2
1363	flannery, thomas	1	8	1
1364	flashman, laura a.	1	17	7
1365	flatau, piotr j.	1	0	1
1366	fletcher, linda	1	14	17
1367	flichtentrei, daniel	1	12	2
1368	flor, martin	1	2	19
1369	flores-rivera, j. j.	1	6	9
1370	fluit, cornelia	1	1	6
1371	flynn, frederick g.	1	9	8
1372	foertsch, mary	1	9	8
1373	folz, b. j.	1	7	5
1374	fong, t. g.	1	317	8
1375	ford, andria	1	5	8
1376	ford, b	1	76	11
1377	ford, gc	1	4	3
1378	foroud, tatiana m.	1	46	1
1379	forsgren, lars	1	14	3
1380	forst, deborah a.	1	1	3
1381	fotedar, neel	1	1	5
1382	fountain, daniel	1	7	10
1383	fox, r	1	12	2
1384	fox-rosellini, susan e.	1	6	13
1385	francis, jibin	1	0	11
1386	franco, jose g.	1	3	8
1387	franco, oscar h.	1	39	10
1388	franke, c.	1	21	8
1389	fredericks, carolyn a.	1	22	4
1390	fredrick, douglas	1	0	11
1391	freeman, w. d.	1	17	4
1392	freiwald, tilo	1	18	3
1393	frempong, tameisha	1	0	11
1394	french, beth c.	1	9	3
1395	fresan-orellana, a.	1	6	9
1396	frew, julia r.	1	1	2
1397	frey, jessica	1	6	6
1398	frich, jan c.	1	4	6
1399	friedman, deborah i.	1	34	5
1400	friedman, joseph h.	1	0	0
1401	friel, david d.	1	0	4
1402	frith, katie	1	0	12
1403	fromme, h. barrett	1	5	7
1404	frost, a. corey	1	7	5
1405	frota, norberto anizio ferreira	1	1	11
1406	frucht, s	1	76	11
1407	frush, donald p.	1	3	1
1408	fu, xue-tao	1	3	7
1409	fuchs, susan	1	2	7
1410	fuetterer, cornelia s.	1	1	5
1411	fugate, jennifer e.	1	31	1
1412	fugh-berman, adriane j.	1	11	2
1413	fuh, jl	1	145	3
1414	fuhs, amy k.	1	10	5
1415	fujii, n	1	2	20
1416	fujisawa, chie	1	35	2
1417	fujiwara, motoshi	1	11	6
1418	fukui, tsuguya	1	5	4
1419	fullam, sarah	1	0	4
1420	fullard, michelle e.	1	1	6
1421	fulton, stephen p.	1	1	3
1422	fung, celia	1	2	19
1423	fung, christopher m.	1	4	11
1424	fung, kwan wai	1	4	4
1425	furlan, anthony j.	1	26	4
1426	furr-stimming, erin	1	0	5
1427	gable, karissa l.	1	11	7
1428	gadoth, n	1	9	4
1429	gainey, jordan c.	1	8	12
1430	gajos, krzysztof z.	1	5	9
1431	galetta, kristin	1	4	1
1432	galetta, steven	1	2	9
1433	galifianakis, nicholas b.	1	21	2
1434	gallagher, katherine a.	1	6	3
1435	gallagher, rm	1	29	4
1436	gallagher, susan	1	66	12
1437	gallegos-kearin, vanessa	1	4	2
1438	galli, federica	1	23	4
1439	galvin, r.	1	35	6
1440	gamble, dale m.	1	1	10
1441	gammage, cynthia e.	1	51	5
1442	gan, jing	1	10	8
1443	gan, r	1	75	4
1444	gane, elise	1	4	6
1445	ganju, aruna	1	104	8
1446	gao, xiaoyuan	1	0	8
1447	garces, juan j.	1	3	8
1448	garcia, catherine m.	1	10	13
1449	garcia-azorin, david	1	10	9
1450	garcia-gavilan, jesus f.	1	3	5
1451	garcia-perez, m. a.	1	13	5
1452	garcia-real, maria i.	1	1	12
1453	garcin, b.	1	11	6
1454	gardiner, joseph	1	1	8
1455	garg, ravindra kumar	1	1	4
1456	gargot, thomas	1	8	15
1457	garner, jayne	1	16	4
1458	garside, sarah	1	130	4
1459	gaspar, phyllis m.	1	7	1
1460	gasparyan, khachatur	1	8	9
1461	gauba, rajat	1	7	7
1462	gaufberg, sv	1	18	2
1463	gavvala, jay r.	1	23	1
1464	gay, ralph	1	16	24
1465	gazibara, tatjana	1	32	4
1466	gehrmann, sebastian	1	5	9
1467	geidl, wolfgang	1	6	3
1468	gelardi, fabrizia	1	12	5
1469	gelb, dj	1	80	4
1470	gelb, douglas j.	1	21	4
1471	geltink, tessa	1	3	9
1472	geocadin, romergryko	1	7	15
1473	geoghegan, kate	1	12	14
1474	george, zeegan	1	1	2
1475	georgiou, ioannis	1	1	10
1476	gera, chanchal	1	7	7
1477	gerard, elizabeth e.	1	8	7
1478	gerdts, jennifer	1	8	17
1479	germano, isabelle m.	1	104	8
1480	geyton, thomas	1	24	4
1481	ghaem, haleh	1	9	4
1482	ghanean, helia	1	14	3
1483	gharooni, aref-ali	1	7	10
1484	ghazal, sola t.	1	0	9
1485	ghazaryan, gayane	1	8	9
1486	ghosh, pritha	1	15	12
1487	ghwanmeh, mamoun	1	17	4
1488	giannotta, sl	1	10	5
1489	giannotta, steven	1	41	18
1490	gibbon, bernard	1	3	1
1491	gibbons, kristen	1	4	14
1492	gienapp, andrew j.	1	1	3
1493	giesler, marianne	1	17	4
1494	giffin, bf	1	9	1
1495	gil-gouveia, raquel	1	5	0
1496	gilchrist, gs	1	62	2
1497	gildersleeve, kasey	1	28	7
1498	giles, julie	1	0	2
1499	gilhus, n. e.	1	1	3
1500	gilhus, n. erik	1	7	4
1501	gill, chandler	1	5	4
1502	gill, dj	1	12	1
1503	gill, irwin	1	1	8
1504	gill, rick	1	0	4
1505	gillespie, colleen	1	12	3
1506	gilmore, rose	1	5	10
1507	ginsburg, robin	1	0	11
1508	giometto, bruno	1	10	21
1509	giordano, martina	1	30	8
1510	giovannoni, gavin	1	61	5
1511	girija, a. s.	1	31	4
1512	girotra, mohit	1	7	7
1513	gjerstad, l.	1	1	3
1514	glass, hannah c.	1	13	5
1515	gleason, carey e.	1	4	16
1516	gleichgerrcht, ezequiel	1	12	2
1517	gnedovskaya, elena	1	5	8
1518	go, roderick a.	1	0	4
1519	goadsby, pj	1	103	1
1520	goel, aastha	1	4	9
1521	gofton, b. t.	1	27	5
1522	gofton, t. e.	1	27	5
1523	gofton, teneille e.	1	2	2
1524	gogia, bhanu	1	6	6
1525	goglin, sarah	1	9	5
1526	gokaslan, ziya l.	1	10	13
1527	goldacre, michael j.	1	5	2
1528	golden, blair p.	1	19	5
1529	goldin, caroline	1	1	6
1530	goldman, ellen	1	0	3
1531	goldsand, g	1	11	6
1532	goldstein, ira m.	1	14	4
1533	goldstein, larry b.	1	7	5
1534	goldstein, zachary	1	3	21
1535	golombievski, esteban	1	0	4
1536	golson, april	1	14	17
1537	gomes, marleide da mota	1	2	0
1538	goncalves, luis	1	16	3
1539	gong, jian	1	7	9
1540	gonzalez, wendy c.	1	19	4
1541	gonzalez-soriano, juncal	1	1	12
1542	gooch, clifton	1	0	0
1543	good, david	1	30	1
1544	goodkin, howard p.	1	15	3
1545	goranitis, i	1	4	12
1546	gormley, gerry	1	8	1
1547	gorsky, kevin	1	5	7
1548	gorter, jan willem	1	2	5
1549	gospe, sidney m., jr.	1	3	3
1550	goss, adeline	1	7	15
1551	gostout, christopher j.	1	3	2
1552	gotfrit, ryan	1	4	6
1553	gotlieb, evelyn g.	1	4	4
1554	gottlieb-smith, rachel j.	1	15	12
1555	gough, melissa	1	7	12
1556	govil-dalela, tuhina	1	0	6
1557	goyal, deepi g.	1	14	5
1558	goyal, monisha	1	14	17
1559	goyal, tarini	1	1	5
1560	graff-radford, neill r.	1	52	3
1561	graham, kait	1	16	24
1562	graham, robert j.	1	35	2
1563	grainger, natalie	1	4	12
1564	granner, m. a.	1	8	4
1565	grant, elizabeth	1	14	2
1566	grant, kenneth	1	11	8
1567	granville, lisa	1	162	5
1568	grassl, roland	1	8	15
1569	grau, sergi	1	2	4
1570	gravenstein, nikolaus	1	4	6
1571	gravino, gilbert	1	1	0
1572	gray, wendy	1	11	8
1573	grbic, douglas	1	10	3
1574	greely, jocelyn	1	2	7
1575	green-harris, gina	1	4	16
1576	greene, john richard t.	1	19	0
1577	greenlaw, celia	1	4	3
1578	greenway, melanie r. f.	1	7	13
1579	greenwood, robert s.	1	3	0
1580	grega, jaimie c.	1	0	3
1581	griffin, sandon	1	0	8
1582	griffin, scott k.	1	8	12
1583	griffith, jennifer l.	1	3	21
1584	grigoriu, bogdan	1	2	10
1585	grinspan, zachary m.	1	28	11
1586	grinzinger, s.	1	4	13
1587	grisold, w	1	5	4
1588	grisold, wolfgang	1	24	3
1589	gropman, andrea	1	4	12
1590	gross, robert a.	1	10	4
1591	grosz, barbara j.	1	5	9
1592	grote, ludger	1	10	18
1593	grove, j	1	322	8
1594	gruber-baldini, ann l.	1	2	7
1595	grujicic, maja	1	2	4
1596	gryfe, david	1	16	24
1597	grzybowski, andrzej	1	1	1
1598	guadix, sergio w.	1	3	7
1599	guay, meagan	1	0	2
1600	guelbert, guillermo	1	5	9
1601	guelbert, norberto	1	5	9
1602	guerguerian, anne-marie	1	4	16
1603	guerrero, anthony	1	8	9
1604	guerrero-camacho, j. l.	1	6	9
1605	guerriero, rejean	1	1	6
1606	guess, sarah c.	1	0	4
1607	guevara-silva, erik	1	3	6
1608	gugger, james j.	1	3	5
1609	gugliucciello, veronique	1	0	7
1610	guidoni, silvia vittoria	1	10	21
1611	guirguis, maged	1	1	14
1612	guizar sanchez, diana patricia	1	8	16
1613	gulek, bernice g.	1	2	7
1614	gulick, danielle	1	1	2
1615	gummerson, christine e.	1	5	11
1616	gummi, rohit	1	2	2
1617	gunaratne, pushpika c.	1	0	8
1618	gunatilake, saman b.	1	39	3
1619	gunn, jane maree	1	16	2
1620	gunter, jeffrey l.	1	208	15
1621	guo, x.	1	50	6
1622	guo, yucheng	1	4	6
1623	gupta, akshita	1	4	9
1624	gupta, amod	1	2	4
1625	gupta, anu	1	5	10
1626	gupta, deepak k.	1	16	4
1627	gupta, p. k.	1	30	3
1628	gurbuz, mehmet sabri	1	7	2
1629	gurin, lindsey	1	0	8
1630	gustafson, d.	1	50	6
1631	gutierrez-herrera, mildred a.	1	14	5
1632	gyoerfi, orsolya	1	3	8
1633	habib, laura	1	13	8
1634	habibi, mitra	1	44	4
1635	haddad, christelle b.	1	0	9
1636	haddara, wael	1	11	5
1637	haga, n.	1	5	7
1638	hageman, joseph	1	2	7
1639	hahn, js	1	5	8
1640	haidar, david a.	1	4	11
1641	hainline, brian	1	2	1
1642	hajhashemi, valiollah	1	24	4
1643	haldeman, joan	1	16	24
1644	haldeman, scott	1	16	24
1645	hales, deborah j.	1	9	2
1646	halford, jonathan j.	1	20	15
1647	halim, saad h. abdul	1	0	9
1648	halker singh, rashmi b.	1	4	3
1649	hall, christiana e.	1	5	11
1650	hall, judith a.	1	4	2
1651	hallenbeck, james	1	28	8
1652	haller, bernhard	1	1	5
1653	hallinan, christine mary	1	16	2
1654	halpern, michael t.	1	7	5
1655	hamberg, katarina	1	28	5
1656	hamer, h. m.	1	7	5
1657	hamilton, alison b.	1	51	5
1658	hamilton, roy	1	20	7
1659	hamilton, roy h.	1	6	3
1660	hamlet, andre	1	8	17
1661	hammoud, maya	1	15	8
1662	han, dong y.	1	18	4
1663	han, xun	1	10	8
1664	hanampa, betsy	1	2	19
1665	handel, adam e.	1	61	5
1666	haneef, zulfi	1	8	3
1667	hannon, p.	1	1	2
1668	hannon, peter	1	0	2
1669	hanrahan, brian j.	1	0	10
1670	hansberry, david r.	1	14	4
1671	hansen, jakob moller	1	4	6
1672	hanson, rebekah l.	1	44	4
1673	harbaugh, robert	1	41	18
1674	hardenbergh, dylan	1	5	11
1675	hardie, ge	1	125	3
1676	hardiman, donna m.	1	0	3
1677	hardy, jessica	1	14	17
1678	harendza, sigrid	1	18	3
1679	hargrave, rita	1	30	5
1680	harle, h.	1	24	7
1681	harpe, jasmin m.	1	11	4
1682	harrell, heather	1	66	12
1683	harrell, kelly m.	1	10	7
1684	harris, devin r.	1	4	4
1685	harris, j	1	76	11
1686	harrison, madaline b.	1	9	1
1687	hart, anthony richard	1	2	2
1688	hart-johnson, tamera	1	5	5
1689	hartman, tim c. olde	1	8	5
1690	hartvigsen, jan	1	16	24
1691	haschke-becher, elisabeth	1	2	6
1692	hashimoto, keiji	1	11	3
1693	hashimoto, naoki	1	2	5
1694	hashmi, s. shahrukh	1	5	6
1695	hassan, ameer e.	1	3	6
1696	hasselbalch, s. g.	1	10	7
1697	hassouni, najia hajjaj	1	4	4
1698	hatami, masumeh	1	0	5
1699	hattery, wendy m.	1	7	13
1700	hattori, h	1	2	20
1701	hatzimanolis, j	1	2	4
1702	hayes, sharonne n.	1	14	5
1703	hazelton, lara	1	21	0
1704	haznedaroglu, seminur	1	0	8
1705	head, jamie	1	0	6
1706	healton, sean	1	8	6
1707	heater, haley d.	1	0	4
1708	hebert, l. e.	1	125	5
1709	heckmann, j. g.	1	44	5
1710	heckmann, jg	1	18	4
1711	heffernan, sean p.	1	4	1
1712	heffron, ari	1	8	6
1713	heinan, kristen	1	5	2
1714	heinskou, tone bruvik	1	23	6
1715	heinze, gerhard	1	8	16
1716	heiser, karen	1	0	0
1717	heissler, hans e.	1	3	5
1718	heitmann, henrik	1	0	5
1719	heji, alaa t.	1	1	7
1720	helms, ann	1	10	3
1721	hemphill, claude	1	16	6
1722	hemphill, j. claude, iii	1	130	6
1723	henderson, kim	1	1	11
1724	hendlmeier, ingrid	1	78	6
1725	hendrickson, rick	1	13	2
1726	hendry, phyllis l.	1	5	1
1727	henke, peter k.	1	6	3
1728	hennerici, m. g.	1	10	21
1729	hennessy, catherine m.	1	106	3
1730	henninger, nils	1	16	14
1731	henri-bhargava, alex	1	0	4
1732	henry, daniel	1	66	12
1733	henry, ka	1	80	4
1734	hentzen, nina b.	1	7	5
1735	heo, ji hoe	1	10	11
1736	hermann, bruce p.	1	4	16
1737	hernandez-mojica, t.	1	6	9
1738	herrero-fernandez, maria j.	1	1	12
1739	herrmann, david n.	1	1	8
1740	hersheson, j.	1	0	4
1741	herskovitz, moshe	1	29	1
1742	herukka, sanna-kaisa	1	36	14
1743	hesselbrock, roger r.	1	41	11
1744	hessler, amy b.	1	18	4
1745	hessler, johannes baltasar	1	78	6
1746	hewage, don chandana	1	8	2
1747	hickenbottom, susan l.	1	9	7
1748	hickman, zachary l.	1	12	5
1749	hicks, w. j.	1	24	7
1750	hidiroglu, seyhan ergin	1	2	6
1751	hier, db	1	19	2
1752	higami, shigeru	1	3	11
1753	higgins, mary f.	1	52	5
1754	higginson, irene j.	1	10	6
1755	hill, elizabeth a.	1	10	18
1756	hill, kevin p.	1	8	5
1757	hilliard, robert i.	1	50	1
1758	hillis, james m.	1	5	1
1759	hilton, nicola	1	5	10
1760	hingray, c.	1	11	6
1761	hirsch, l. j.	1	57	6
1762	hirsh, david	1	191	3
1763	hlavac, rebecca j.	1	10	4
1764	hmamouchi, ihssane	1	4	4
1765	ho, jacqueline b.	1	1	5
1766	hoch, jeffrey s.	1	23	9
1767	hocker, sara e.	1	7	1
1768	hoefler, julia	1	2	13
1769	hoff, j. m.	1	1	3
1770	hoffmann, esther m.	1	2	13
1771	hogan, david b.	1	0	4
1772	hogan, re	1	18	6
1773	hoh, brian l.	1	41	18
1774	hohmann, louisa	1	7	3
1775	holck, p	1	322	8
1776	holden, k. r.	1	5	4
1777	holden, kenton r.	1	3	2
1778	holland, gj	1	9	2
1779	holler, natalja	1	3	8
1780	holliday, elizabeth g.	1	1	11
1781	hollingsworth, ethan	1	14	3
1782	holloway, rg	1	16	2
1783	holman, elizabeth	1	4	11
1784	holtkamp, martin	1	7	3
1785	holzemer, em	1	18	6
1786	honda, manami	1	11	3
1787	hood, michael c.	1	8	12
1788	hopp, jennifer l.	1	20	15
1789	hopper, adrian	1	10	6
1790	horak, holli	1	10	5
1791	horak, holli a.	1	18	4
1792	horak, robin	1	25	6
1793	horinouchi, toru	1	2	5
1794	horsely, tanya	1	0	3
1795	hoshi, h	1	2	20
1796	hou, ping	1	28	6
1797	houston, stephanie	1	4	16
1798	hovaguimian, alexandra	1	8	6
1799	hovey, sara w.	1	2	2
1800	howard, jonathan	1	12	3
1801	howell, eric e.	1	59	5
1802	howington, jay u.	1	41	18
1803	hoyle, chad	1	15	4
1804	hsiao, cheng-ting	1	6	6
1805	hsieh, peggy	1	0	5
1806	hsieh, peggy h.	1	7	6
1807	hsieh, suh-ing	1	6	6
1808	hsu, li-ling	1	6	6
1809	hsueh, yu-mei	1	52	8
1810	hu, bo	1	1	9
1811	hu, jingman	1	4	4
1812	hu, jun	1	1	4
1813	hu, katherine	1	5	11
1814	hu, lanying	1	28	6
1815	hu, xinhang	1	1	7
1816	hu, yi	1	3	7
1817	huang, elaine shinwei	1	6	6
1818	huang, grace c.	1	11	2
1819	huang, hsuan-ying	1	12	3
1820	huang, jiao	1	6	2
1821	huang, josephine f.	1	7	13
1822	huang, judy	1	21	7
1823	huang, rob d.	1	4	11
1824	huang, shuqi	1	4	4
1825	huang, william	1	2	7
1826	huang, xi	1	2	3
1827	huang, y.	1	0	2
1828	huang, yu-ching	1	13	8
1829	huang, yu-li	1	0	3
1830	huber, bernd	1	5	9
1831	hudson, j. n.	1	24	0
1832	hugenholtz, h	1	11	6
1833	hughes, amy	1	4	6
1834	humayun, khadija nuzhat	1	0	6
1835	humphrey- murto, susan	1	0	3
1836	hunanyan, arsen	1	50	4
1837	hunderfund, andrea n. leep	1	7	4
1838	hung, peir-haur	1	52	8
1839	hunt, jeffrey	1	11	3
1840	huq, sakibul	1	23	9
1841	hurley, jennifer	1	7	15
1842	hurtado, alicia	1	3	9
1843	hurwitz, eric	1	16	24
1844	ibeziako, patricia i.	1	42	8
1845	ibrahim, afaf a. g.	1	1	7
1846	ichise, m	1	2	20
1847	ichord, rebecca	1	37	10
1848	iglseder, s.	1	4	13
1849	illes, j	1	37	5
1850	imitola, jaime	1	14	3
1851	ince, stefanie	1	16	24
1852	inouye, s. k.	1	317	8
1853	inzitari, domenico	1	1	1
1854	iodice, francesco	1	6	8
1855	ionel, dana l.	1	0	3
1856	ishida, wataru	1	23	9
1857	ishii, chika	1	3	6
1858	ishikawa, shuhei	1	2	5
1859	ishiwata, akiko	1	3	6
1860	isles, rosemary	1	37	8
1861	ismail, ismail ibrahim	1	0	1
1862	ismail, nadia	1	2	7
1863	ito, k	1	2	20
1864	itti, emmanuel	1	8	6
1865	iuhtimovschi, l	1	13	6
1866	iyer, anand	1	12	1
1867	iype, thomas	1	5	10
1868	izumi, tatsuro	1	7	2
1869	izzy, saef	1	5	11
1870	jaarsma, joke	1	7	5
1871	jacinto, luis jorge	1	5	5
1872	jack, clifford r., jr.	1	208	15
1873	jack, susan	1	2	5
1874	jacklin, chloe	1	4	4
1875	jackson, c	1	27	8
1876	jackson, jennifer	1	4	2
1877	jacobs, joshua	1	5	4
1878	jacobs, m.	1	57	6
1879	jacobson, pl	1	5	1
1880	jacobson, sansea	1	11	3
1881	jacobsson, lars	1	14	3
1882	jafri, wasim	1	11	4
1883	jagolino, amanda l.	1	28	7
1884	jain, v	1	62	2
1885	jamal, leila	1	201	7
1886	jan, mohammed m.	1	27	6
1887	janies, kathryn	1	2	7
1888	janiszewska, katarzyna	1	2	6
1889	jankovic, j.	1	9	5
1890	jannotta, gemi e.	1	2	7
1891	janvier, annie	1	4	2
1892	jao, cs	1	19	2
1893	jara-prado, a.	1	6	9
1894	jatuzis, dalius	1	2	5
1895	javier arranz, francisco	1	0	1
1896	jayaraj, kesikan	1	5	7
1897	jeffery, jane b.	1	26	9
1898	jehan, fyezah	1	0	6
1899	jenkins, alistair	1	7	12
1900	jenkins, mary	1	0	4
1901	jenkins, mary e.	1	3	4
1902	jenkinson, michael d.	1	7	12
1903	jerath, angela	1	5	7
1904	jewett, ea	1	62	2
1905	jhonson, marc	1	13	8
1906	jia, judy	1	28	7
1907	jiang, long-yuan	1	24	6
1908	jiang, yuwu	1	28	11
1909	jiao, yun-gen	1	3	7
1910	jimenez, sara	1	1	12
1911	joffe, aaron	1	2	7
1912	jogi, vishal	1	2	4
1913	johansson, b.	1	50	6
1914	johansson, eva	1	28	5
1915	johansson, tim	1	2	6
1916	johnsen, kyle j.	1	10	5
1917	johnson, aleksandra	1	31	3
1918	johnson, jl	1	62	5
1919	johnson, paul d.	1	5	4
1920	johnson, stacy l.	1	3	17
1921	johnson, sterling c.	1	4	16
1922	johnson, w. travis	1	4	6
1923	johnston, donna l.	1	10	20
1924	johnston, kc	1	9	0
1925	johnston, michael v.	1	0	1
1926	johnston, wendy s. w.	1	28	3
1927	jokanovic, milan	1	25	2
1928	jokeit, hennric	1	2	13
1929	jokubaitis, mantas	1	2	5
1930	jonas, rinat	1	4	3
1931	jones, david t.	1	8	1
1932	jones, lyell k.	1	0	10
1933	jones, r. n.	1	317	8
1934	jordan, morgan	1	0	2
1935	joshi, charuta	1	3	2
1936	joshi, sucheta m.	1	15	6
1937	jost, meike	1	17	4
1938	jovin, tudor g.	1	41	18
1939	joyce, cara	1	0	5
1940	joyce, cara j.	1	5	11
1941	jozefowicz, r. f.	1	15	9
1942	jozefowicz, ralph	1	2	19
1943	jradi, hoda	1	34	6
1944	ju, feng	1	0	3
1945	juang, kd	1	145	3
1946	juel, vern c.	1	15	8
1947	jukna, sarunas	1	0	2
1948	julian, katie	1	14	3
1949	jung, agam	1	3	3
1950	jung, richard	1	36	6
1951	jung, yohan	1	10	11
1952	junge, magdalena nora	1	78	6
1953	juul, d	1	9	3
1954	juul, d.	1	15	9
1955	kaasila, raimo	1	7	2
1956	kaeuser, g.	1	7	5
1957	kako, n	1	2	20
1958	kalamangalam, giridhar p.	1	20	15
1959	kalia, hemant	1	1	14
1960	kaliaperumal, chandrasekaran	1	5	3
1961	kalika, paige m.	1	6	13
1962	kalita, j	1	28	3
1963	kalita, jayantee	1	0	1
1964	kallen, a. j. bengt	1	45	5
1965	kalvach, p	1	13	6
1966	kalyanasundaram, gokul	1	5	2
1967	kam, kai-qian	1	24	5
1968	kamat, deepak	1	0	6
1969	kamide, anri	1	11	3
1970	kaminski, h.	1	2	4
1971	kaminsky-castillo, irina	1	2	3
1972	kamondi, anita	1	0	1
1973	kamour, abdulbaset h.	1	18	4
1974	kamran, mudassar	1	4	5
1975	kandiah, nagaendran	1	58	5
1976	kane, gregory	1	66	12
1977	kane, heather l.	1	7	5
1978	kane, patrick bodilly	1	0	5
1979	kanellopoulos, thanos	1	8	15
1980	kang jiaxun	1	0	5
1981	kang, kyung-ah	1	16	4
1982	kang, peter b.	1	15	6
1983	kanmounye, ulrick sidney	1	7	12
1984	kann, d	1	37	5
1985	kanner, ronald	1	0	1
1986	kantarci, kejal	1	208	15
1987	kaplan, t. b.	1	1	2
1988	kapur, kush	1	25	6
1989	karakas, cemal	1	3	2
1990	karakis, ioannis	1	2	11
1991	karaman, yahya	1	0	8
1992	karamian, amanda g. sandoval	1	0	2
1993	karelis, guntis	1	2	5
1994	karimi, afrooz	1	1	4
1995	kariyawasam, didu	1	0	12
1996	kariyawasam, pramudika nirmani	1	8	2
1997	karlikaya, geysu	1	6	4
1998	karpinski, aryn c.	1	15	3
[truncated: 2,341 more rows]
